# Supplementary material
Source: PubMed Central journal article supplement (PMC5837821)
Supplement: NIHMS946092-supplement-Supporting_Figure.pdf [file NIHMS946092-supplement-Supporting_Figure.pdf]

**Supporting Information for:**

**Packaged and free STMV RNA genomes adopt distinct conformational states**

Bridget C. Larman<sup>†</sup>, Elizabeth A. Dethoff and Kevin M. Weeks\*

Department of Chemistry, University of North Carolina, Chapel Hill, NC 27599-3290

<sup>†</sup> University of North Carolina Undergraduate Transcriptome Project

\* correspondence, weeks@unc.edu

**Figure S1.** Secondary structure model for the capsid-free STMV RNA genome. Nucleotides are colored by SHAPE reactivity; black, orange, and red represent low, moderate, and high reactivities, respectively. Lines indicating base pairs are colored by base pair probability (legend). Nucleotides with no SHAPE data are colored grey.

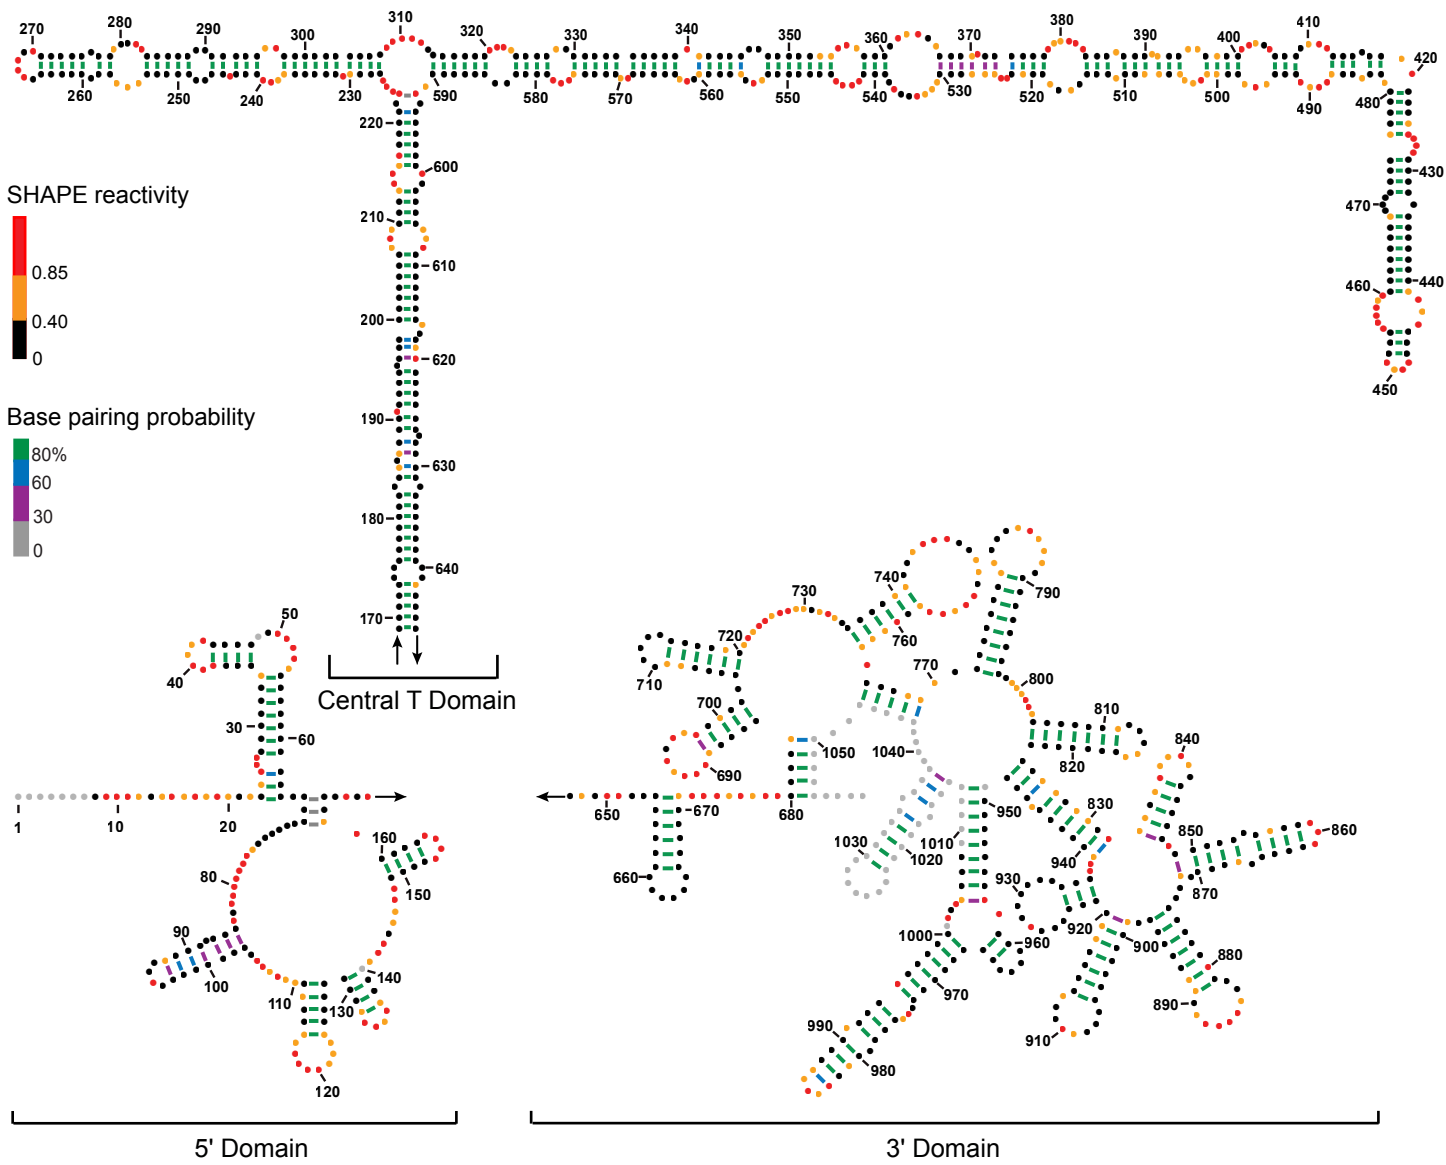

Supplemental Figure 1
